# Supplementary material for: Synthesis, reaction, and optical properties of cyclic oligomers bearing 9,10-diphenylanthracene based on an aromatic tertiary amide unit
Source: Royal Society of Chemistry journal article supplement (doi:10.1039/c3ra46652c), 2014-01-01
Supplement: c3ra46652c.pdf [file c3ra46652c.pdf]

Supporting Information Available for

**Synthesis, Reaction, and Optical Properties of Cyclic Oligomers bearing 9,10-Diphenylanthracene Based on an Aromatic Tertiary Amide Unit**

Ryohei Yamakado,<sup>a</sup> Shin-ichi Matsuoka,<sup>a</sup> Masato Suzuki,<sup>a</sup> Daisuke Takeuchi,<sup>b</sup> Hyuma Masu,<sup>c</sup> Isao Azumaya,<sup>d</sup> and Koji Takagi<sup>a\*</sup>

a Department of Materials Science and Engineering, Nagoya Institute of Technology Gokiso-cho, Showa-ku, Nagoya 466-8555, Japan

b Chemical Resources Laboratory, Tokyo Institute of Technology, 4259 Nagatsuta-cho, Midori-ku, Yokohama 226-8503, Japan

c Chemical Analysis Center, Chiba University, 1-33 Yayoi-cho, Inage-ku, Chiba 263-8522, Japan

d Faculty of Pharmaceutical Sciences, Toho University, 2-2-1 Miyama, Funabashi, Chiba 274-8510, Japan

Contents

|                                                          |         |
|----------------------------------------------------------|---------|
| 1. Synthesis of <b>C3A'</b> , <b>C4A'</b> , and <b>2</b> | S2–S3   |
| 2. Copy of NMR spectra                                   | S4–S13  |
| 3. GPC profiles                                          | S14     |
| 4. MALDI-TOF MS                                          | S15–S16 |
| 5. UV and fluorescence spectra                           | S17–S19 |



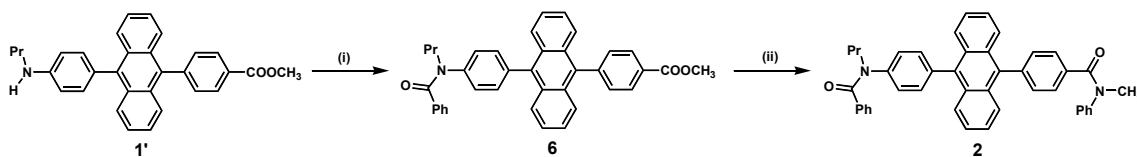

Scheme S2. Synthetic route to model compound **2**. Condition and reagents: i) Benzoylchloride, Pyridine, THF, reflux; ii) *N*-Methylaniline, LiHMDS (1 M THF soln.), THF, 0 °C.

## 6

Compound **1'** was prepared as **1**. To a solution of **1'** (222 mg/ 0.5 mmol) in pyridine (2 mL) and THF (2 mL) was added benzoylchloride (0.08 mL/ 0.6 mmol), and the system was heated to reflux overnight. The reaction mixture was poured into water, and an aqueous phase was extracted with DCM. The combined organic phase was washed with 1 M HCl. After drying over MgSO<sub>4</sub>, solvents were removed by the rotary evaporator. The crude product was purified by column chromatography (ethyl acetate/DCM = 1/3) to obtain yellow powder (250 mg, 91%). M.p. 256–257 °C. <sup>1</sup>H NMR (δ, 200 MHz, ppm, CDCl<sub>3</sub>) 8.28 (d, *J* = 8.6 Hz, 2H), 8.17 (d, *J* = 8.0 Hz, 2H), 7.71–7.27 (17H), 4.10–3.90 (5H), 1.83 (m, 2H), 1.08 (t, *J* = 7.0 Hz, 3H).

## 2

To a THF (5 mL) solution of **6** (250 mg/ 0.45 mmol) and *N*-methylaniline (0.08 mL/ 0.75 mmol) was added dropwise a 1.0 M THF solution of LiHMDS (1.0 mL), and the system was stirred for 10 h. After saturated aq. NH<sub>4</sub>Cl was added, an aqueous phase was extracted with DCM. A combined organic phase was dried over MgSO<sub>4</sub> and solvents were removed by the rotary evaporator. The resulted solid was recrystallized with CHCl<sub>3</sub>/hexane to give yellow crystals (140 mg, 50%).

M.p. 329–330 °C. <sup>1</sup>H NMR (δ, 200 MHz, ppm, CDCl<sub>3</sub>) 7.53 (d, *J* = 7.8 Hz, 2H), 7.51–7.46 (2H), 7.43 (d, *J* = 7.8 Hz, 2H), 7.37–7.21 (d, *J* = 7.9 Hz, 2H), 7.20 (d, *J* = 8.6 Hz, 2H), 4.06 (d, *J* = 6.1 Hz, 2H), 3.61 (s, 3H), 1.07 (t, *J* = 6.1 Hz, 3H). <sup>13</sup>C NMR (δ, 50 MHz, ppm, CDCl<sub>3</sub>) 170.7, 170.4, 144.9, 140.2, 136.6, 136.2, 131.9, 130.7, 129.5, 129.1, 128.7, 128.1, 127.7, 127.1, 126.7, 125.1, 38.3, 30.3, 21.2, 11.5.

## 2. Copy of NMR spectra

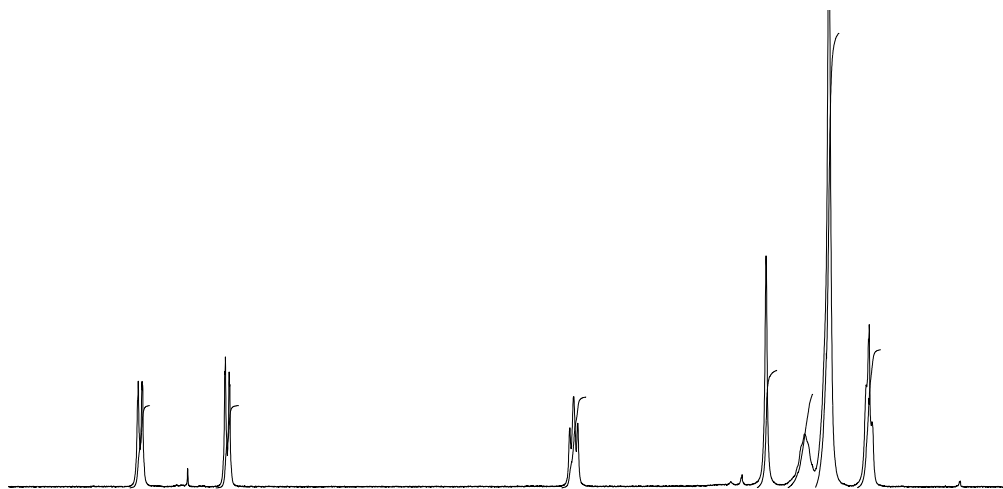

Figure S1.  $^1\text{H}$  NMR spectrum of **3** in  $\text{CDCl}_3$ .

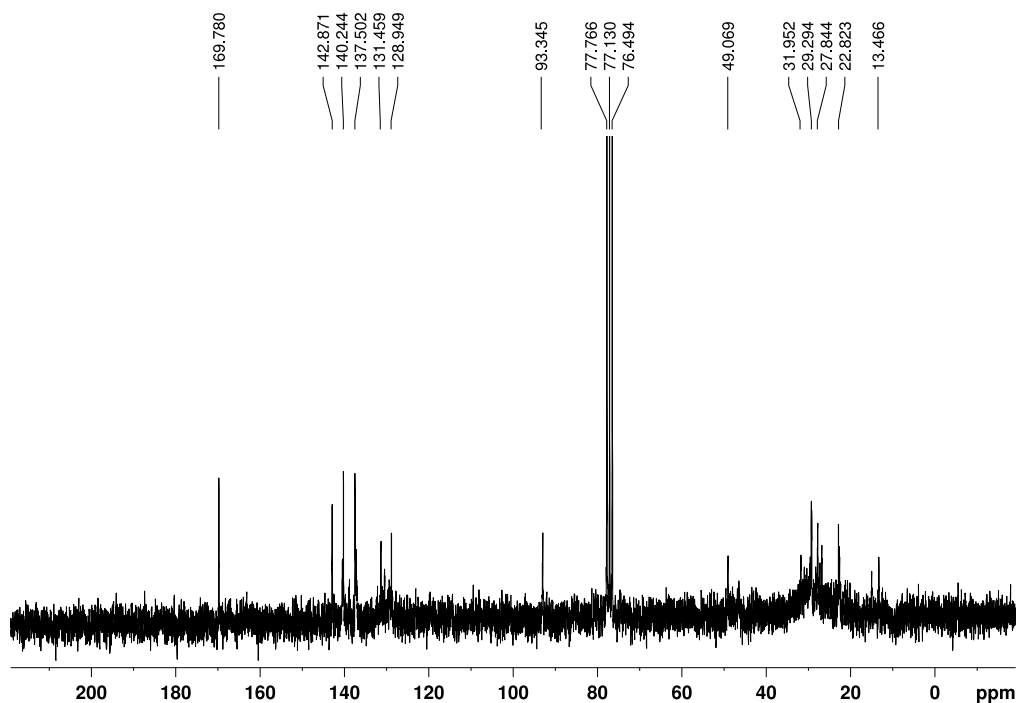

Figure S2.  $^{13}\text{C}$  NMR spectrum of **3** in  $\text{CDCl}_3$ .

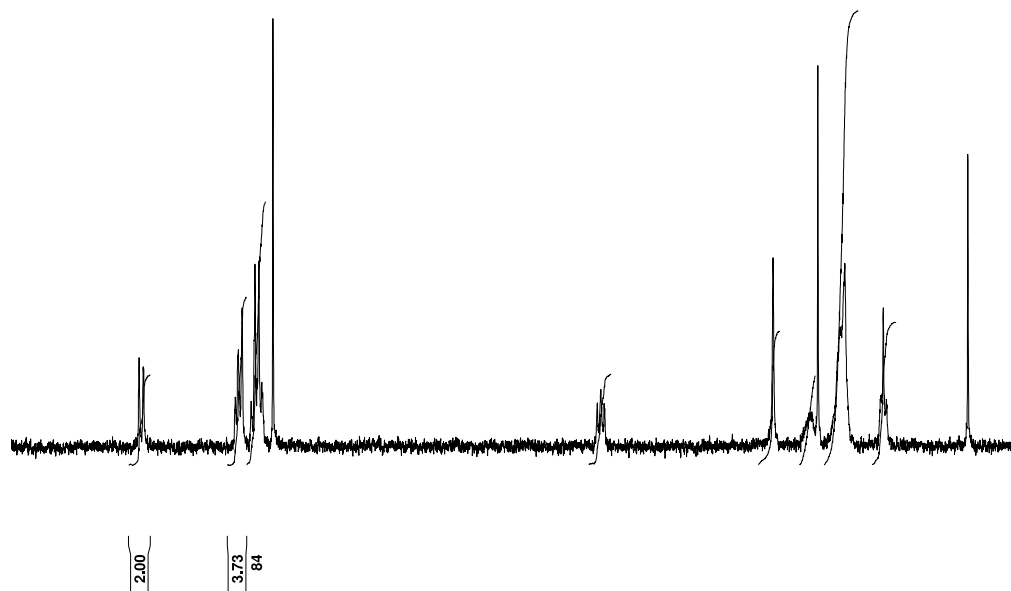

Figure S3.  $^1\text{H}$  NMR spectrum of **4** in  $\text{CDCl}_3$ .

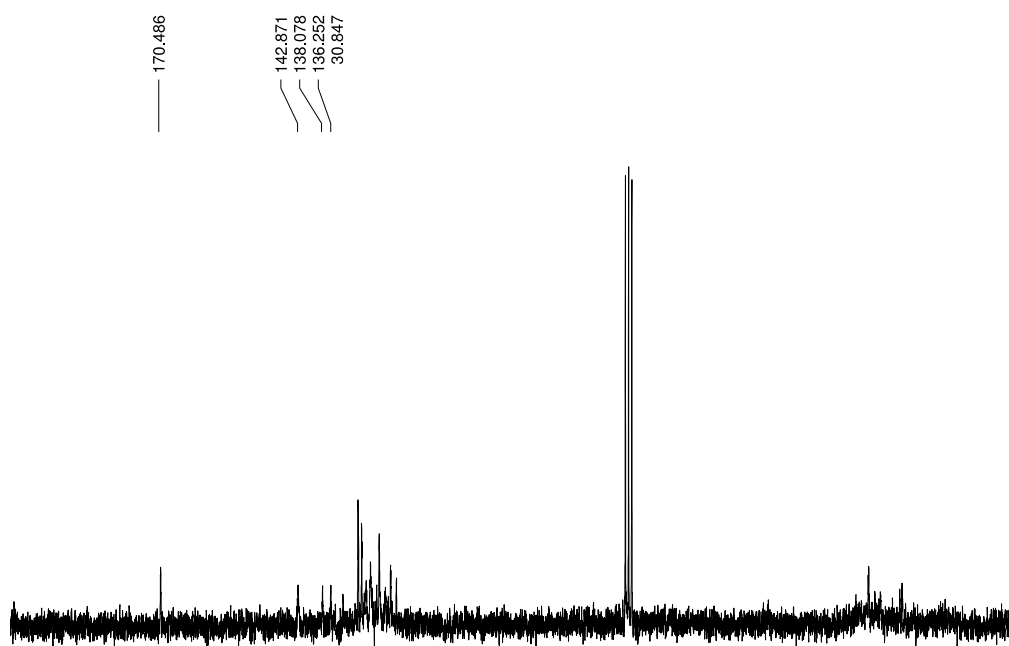

Figure S4.  $^{13}\text{C}$  NMR spectrum of **4** in  $\text{CDCl}_3$ .

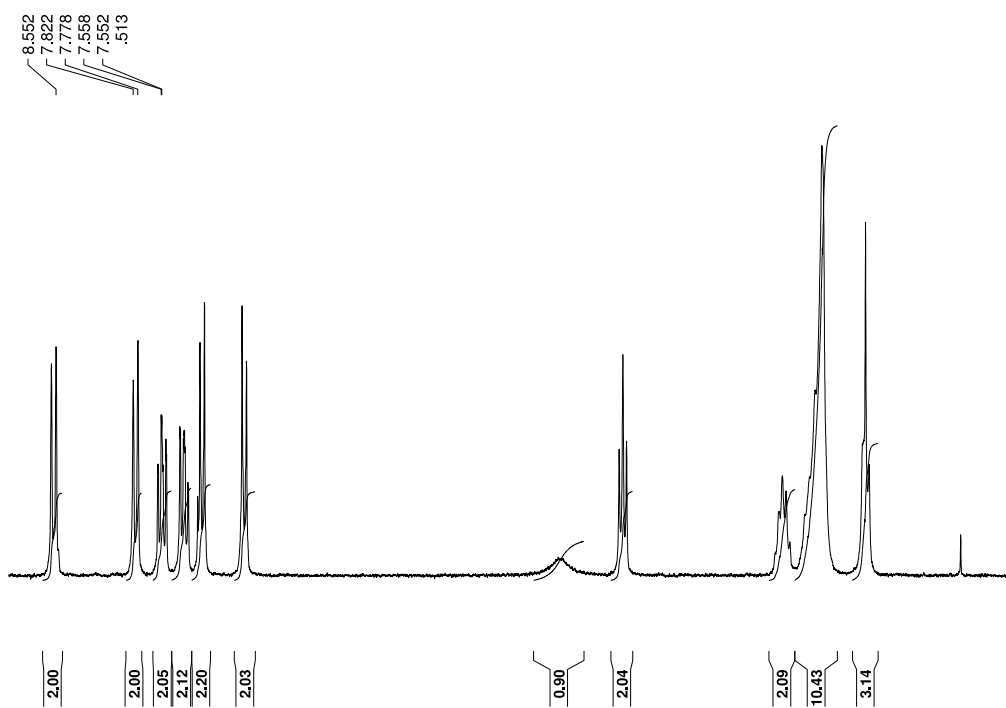

Figure S5.  $^1\text{H}$  NMR spectrum of **5** in  $\text{CDCl}_3$ .

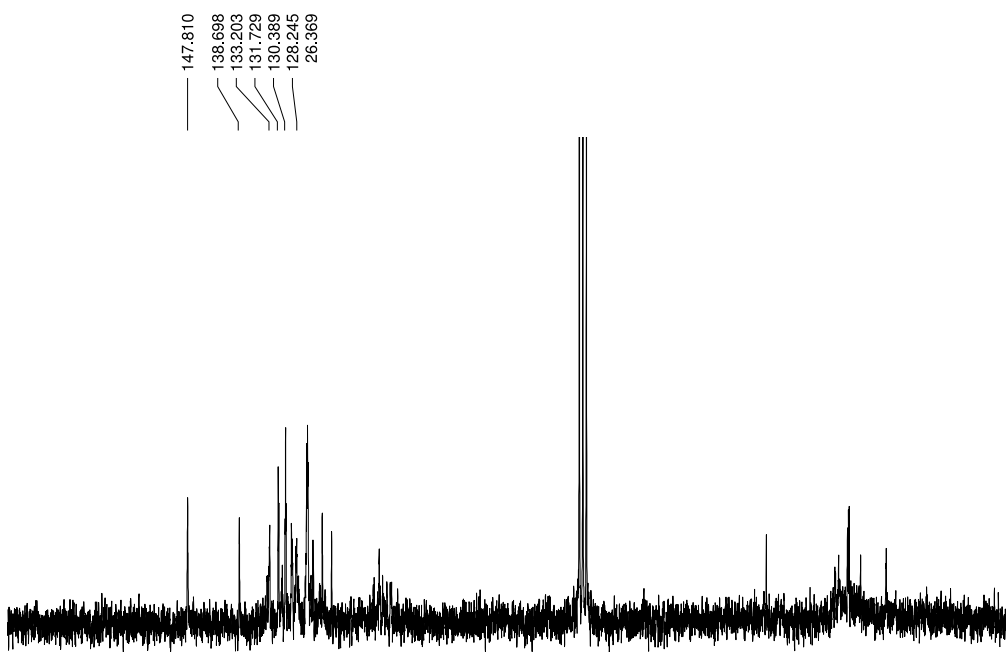

Figure S6.  $^{13}\text{C}$  NMR spectrum of **5** in  $\text{CDCl}_3$ .

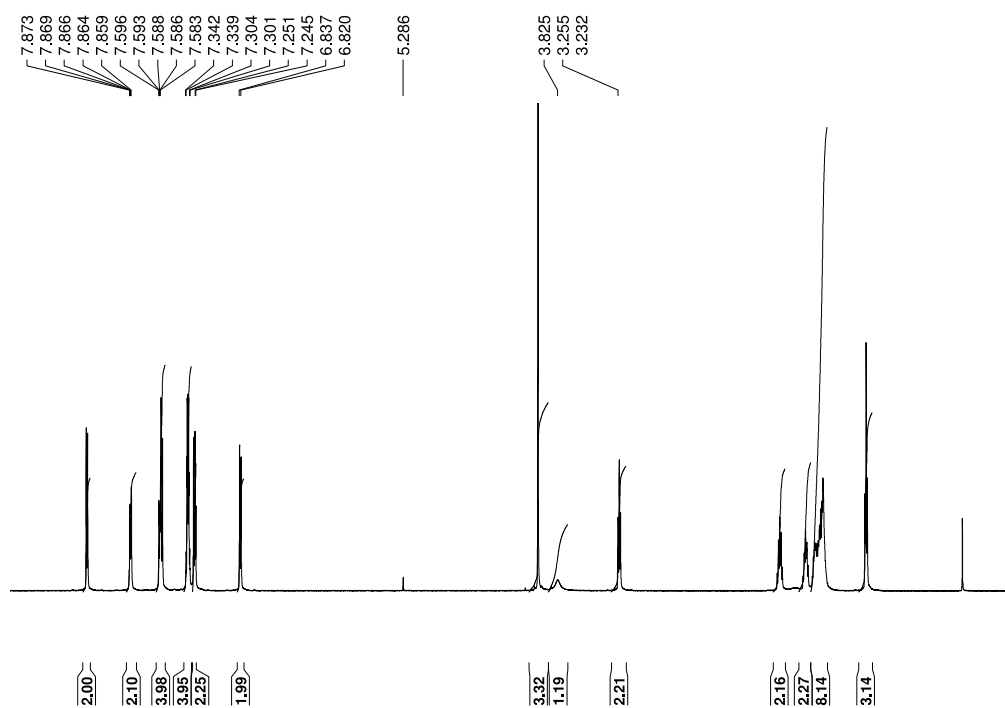

Figure S7.  $^1\text{H}$  NMR spectrum of **1** in  $\text{CDCl}_3$ .

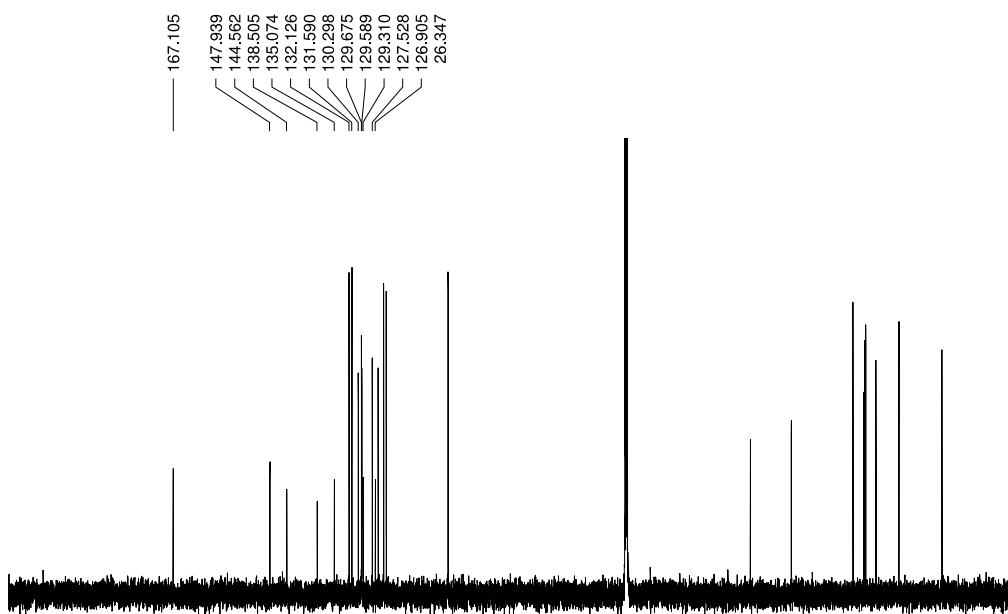

Figure S8.  $^{13}\text{C}$  NMR spectrum of **1** in  $\text{CDCl}_3$ .

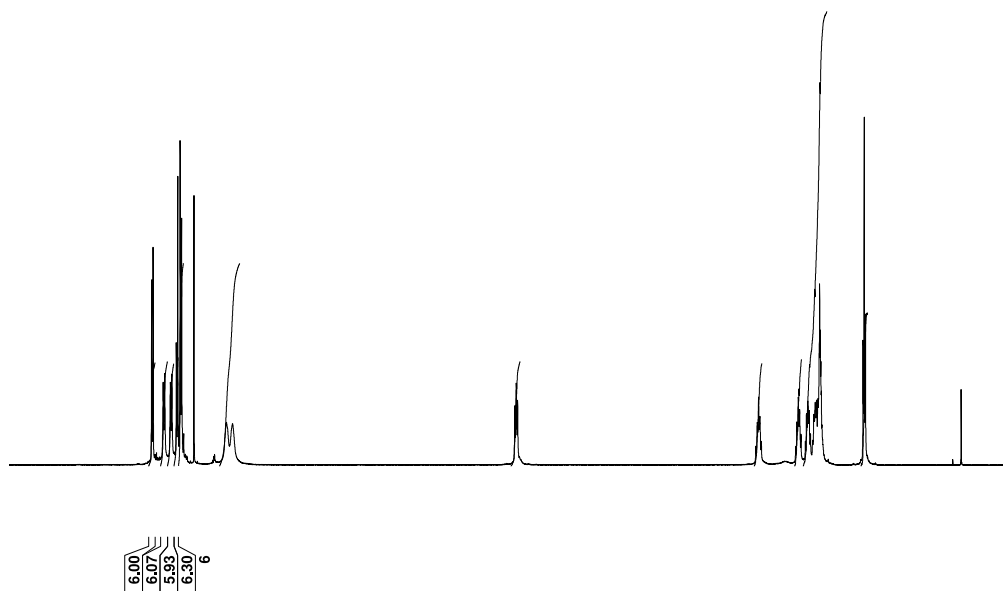

Figure S9.  $^1\text{H}$  NMR spectrum of **C3A** in  $\text{CDCl}_3$ .

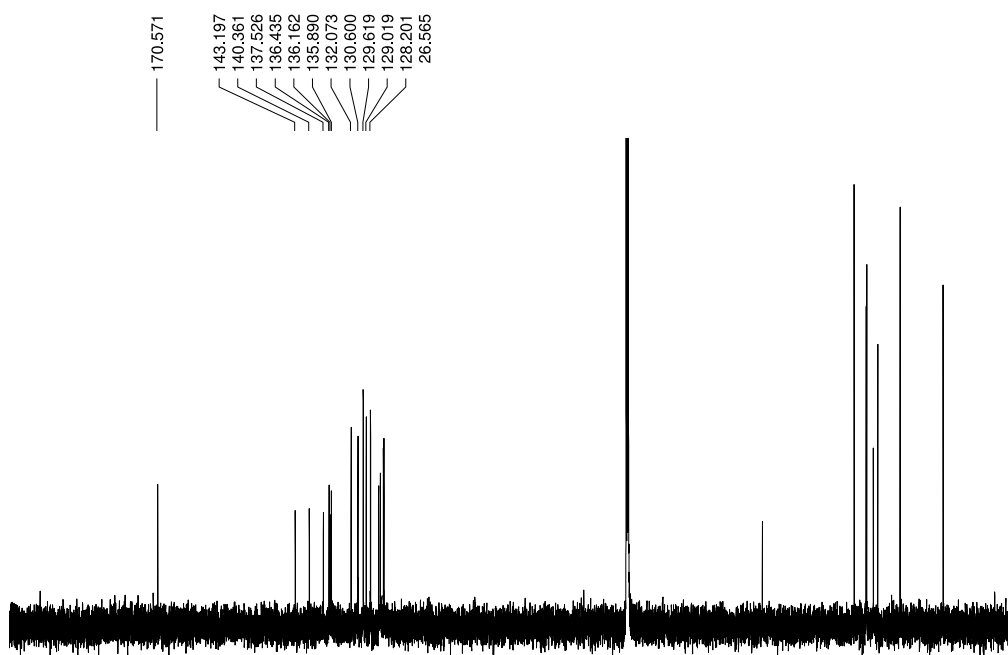

Figure S10.  $^{13}\text{C}$  NMR spectrum of **C3A** in  $\text{CDCl}_3$ .



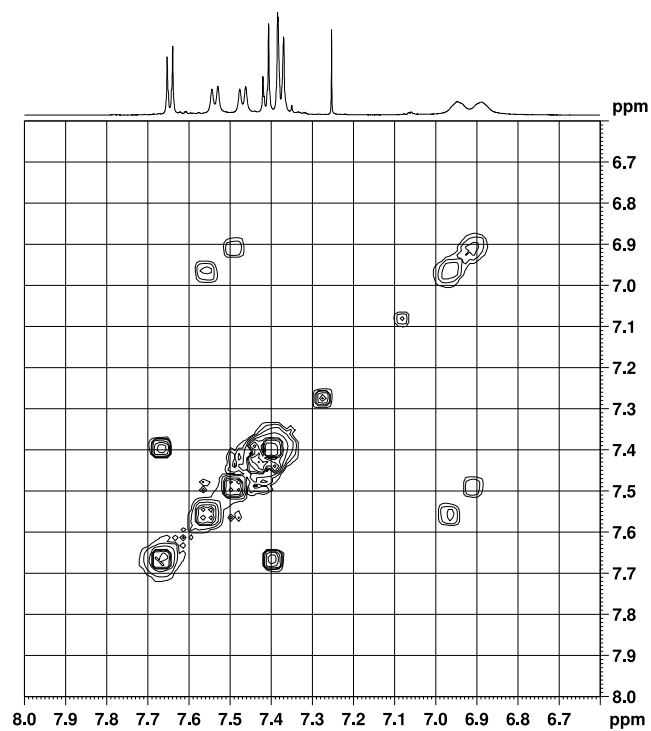

Figure S11. H-H COSY of **C3A** in CDCl<sub>3</sub> (aromatic region).

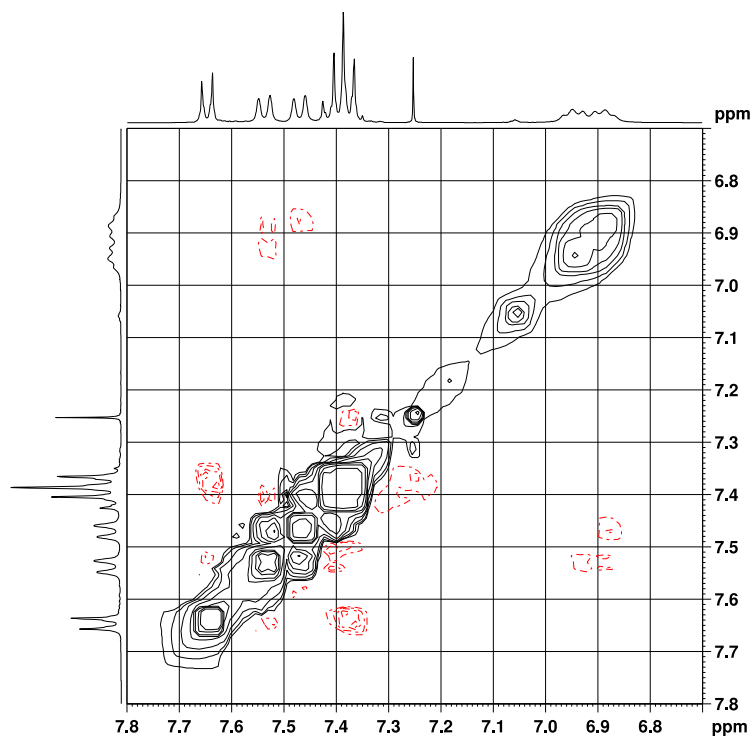

Figure S12. ROESY of **C3A** in CDCl<sub>3</sub> (aromatic region).

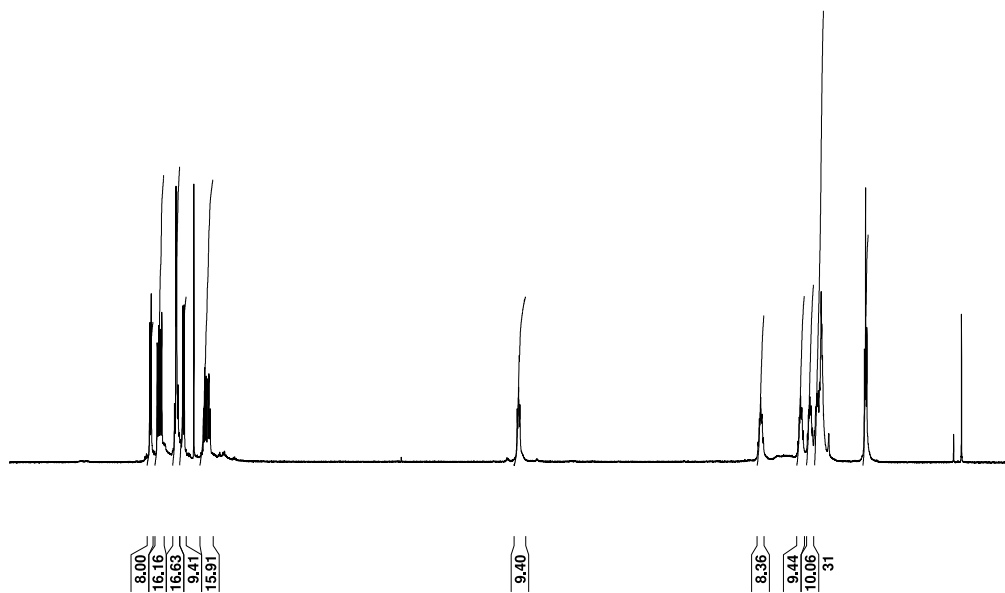

Figure S13.  $^1\text{H}$  NMR spectrum of **C4A** in  $\text{CDCl}_3$ .

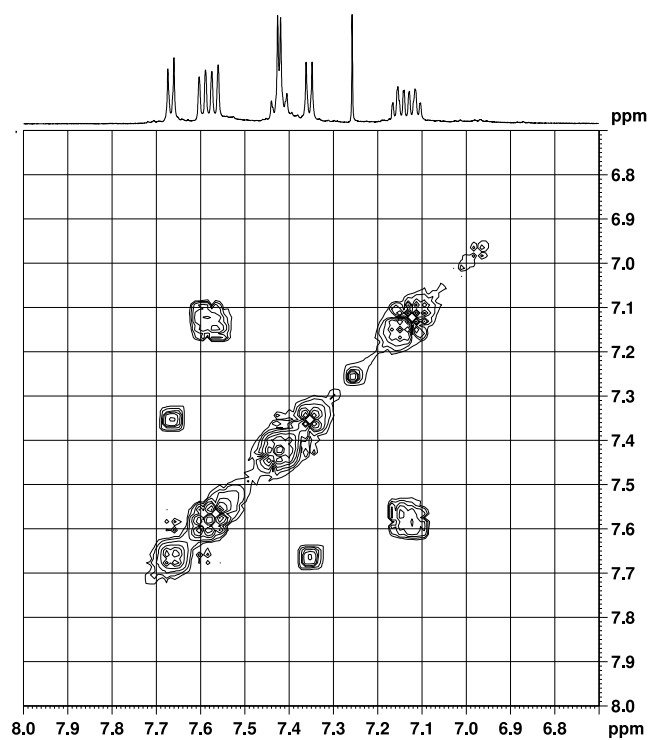

Figure S14. H-H COSY of **C4A** in  $\text{CDCl}_3$  (aromatic region).

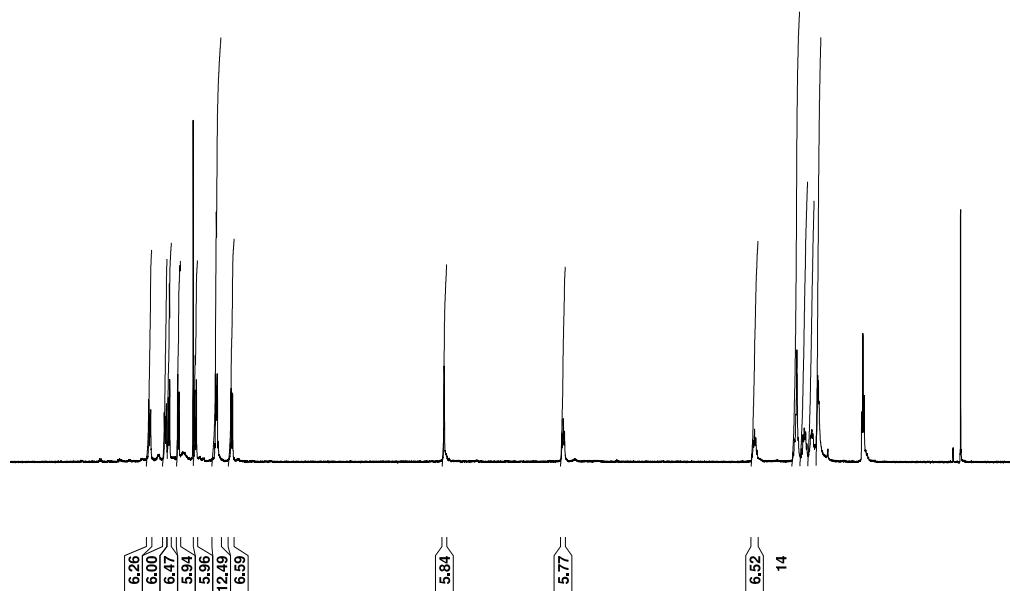

Figure S15. <sup>1</sup>H NMR spectrum of **HC3A** in CDCl<sub>3</sub>.

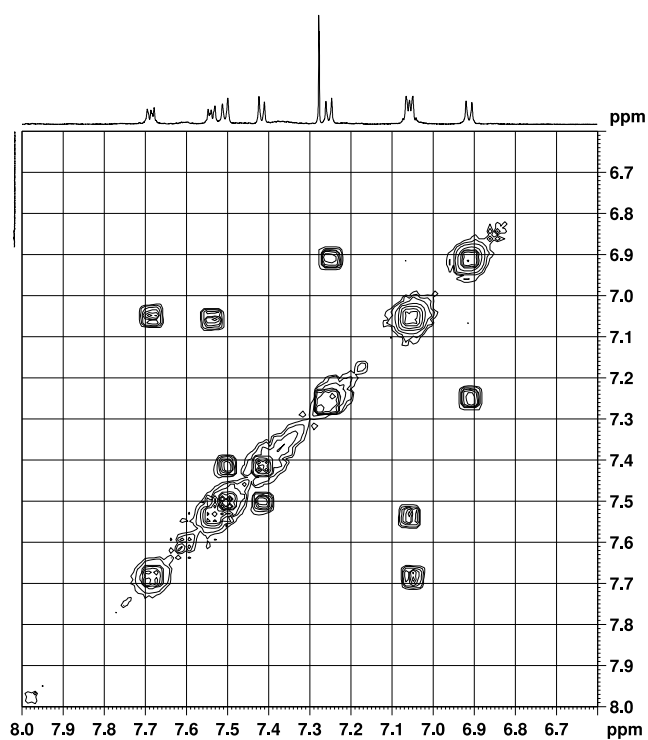

Figure S16. H-H COSY of **HC3A** in CDCl<sub>3</sub>(aromatic region)

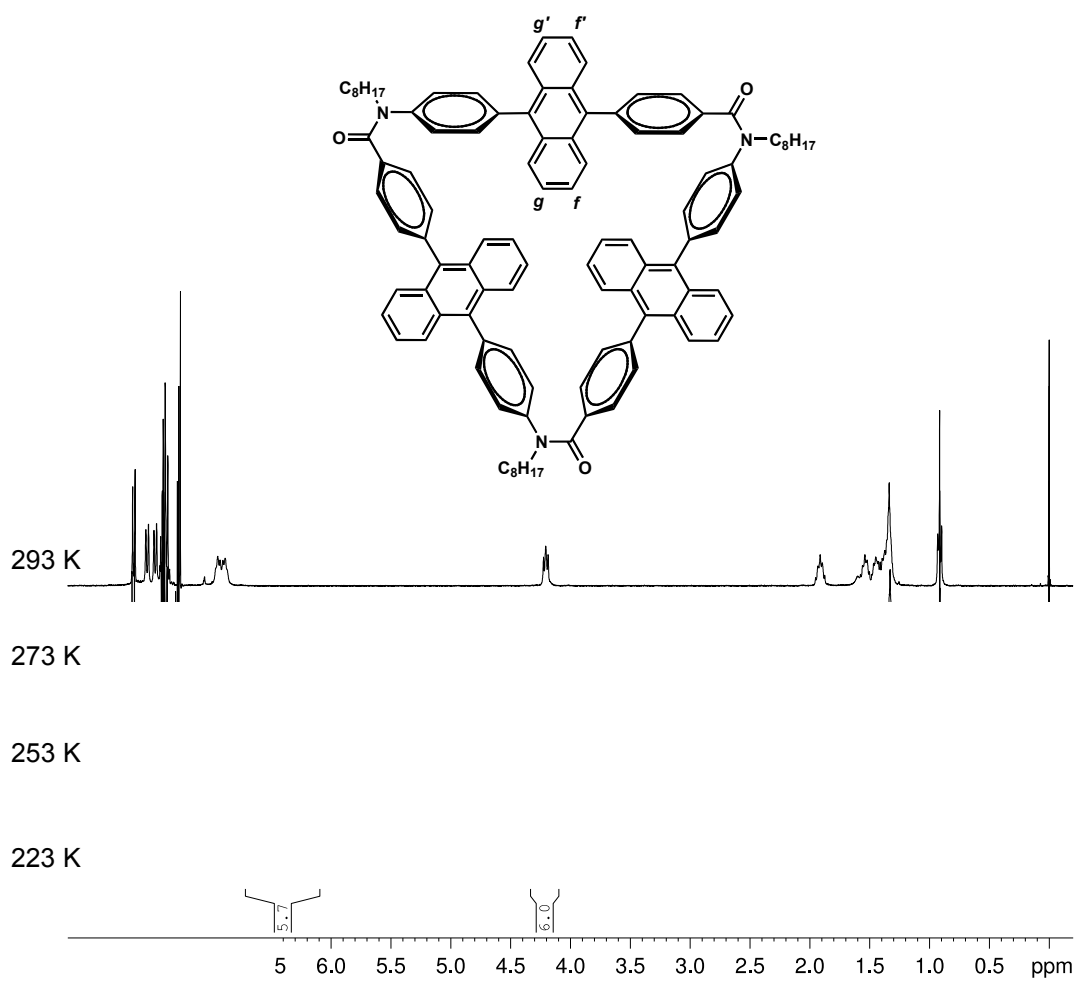

Figure S17. Variable-temperature  $^1\text{H}$  NMR spectra of **C3A** in  $\text{CDCl}_3$ .

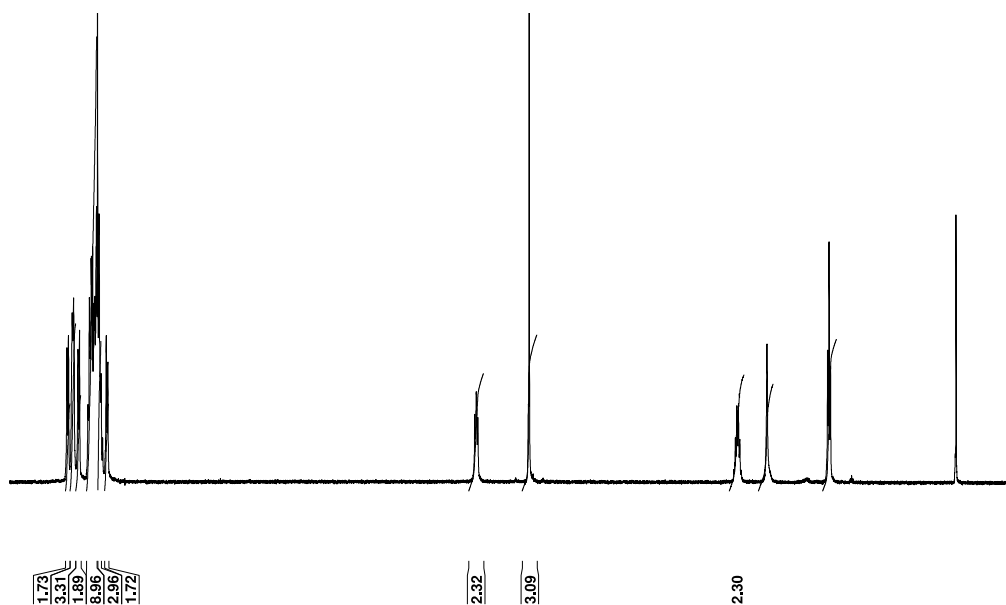

Figure S18.  $^1\text{H}$  NMR spectrum of **2** in  $\text{CDCl}_3$ .

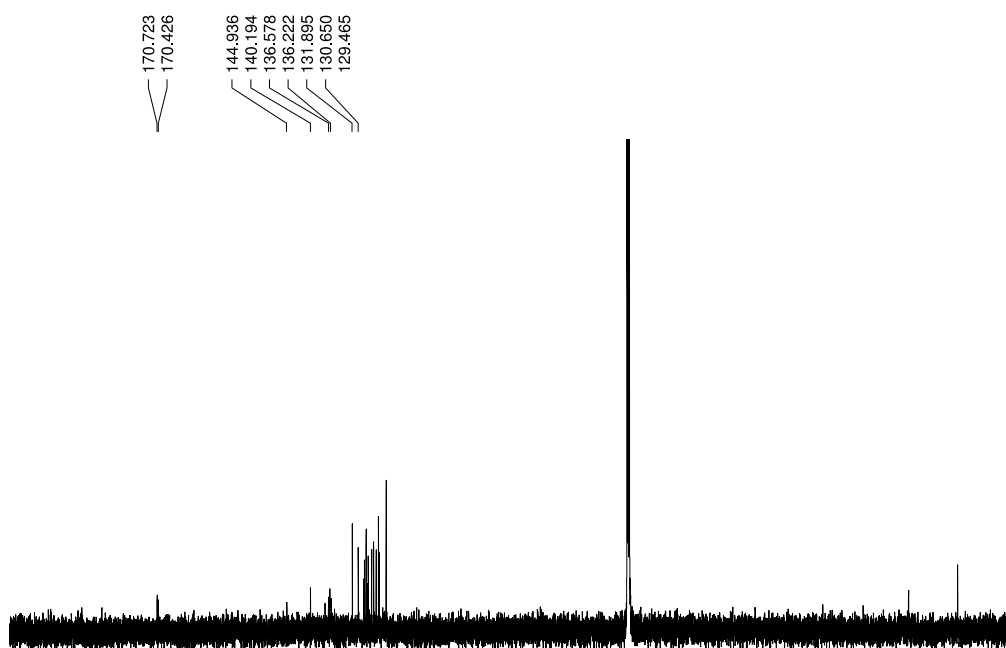

Figure S19.  $^{13}\text{C}$  NMR spectrum of **2** in  $\text{CDCl}_3$ .

## 2. GPC profiles

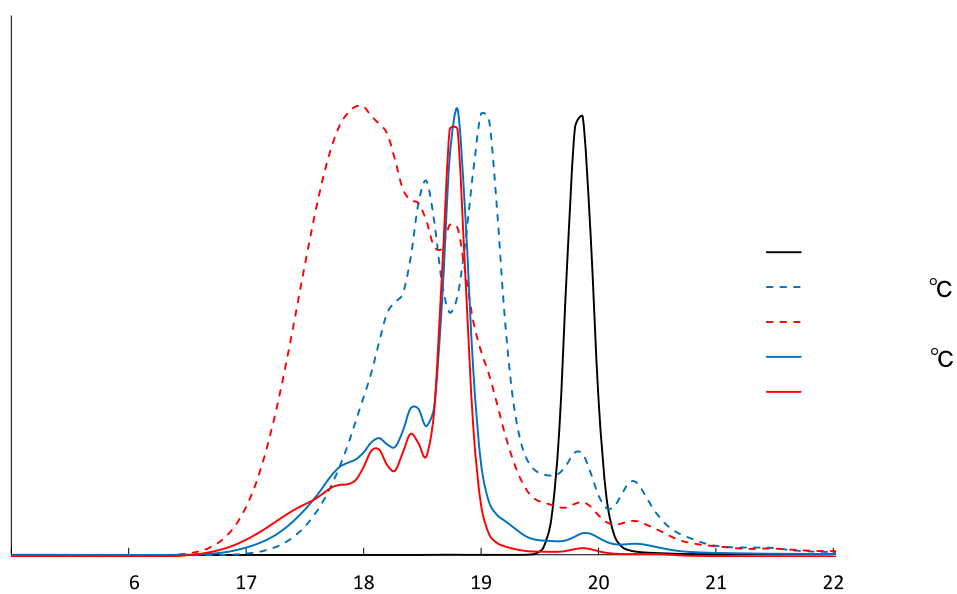

Figure S20. GPC (THF) profiles of reaction mixture.

### 3. MALDI-TOF MS

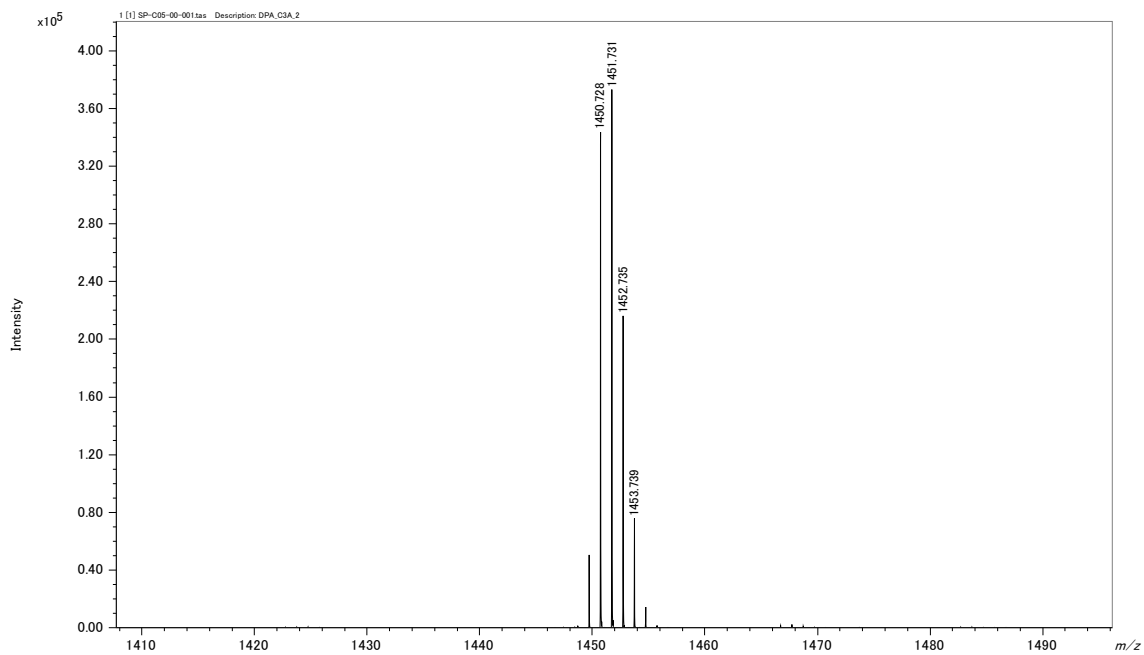

Figure S21. MALDI-TOF MS of C3A.

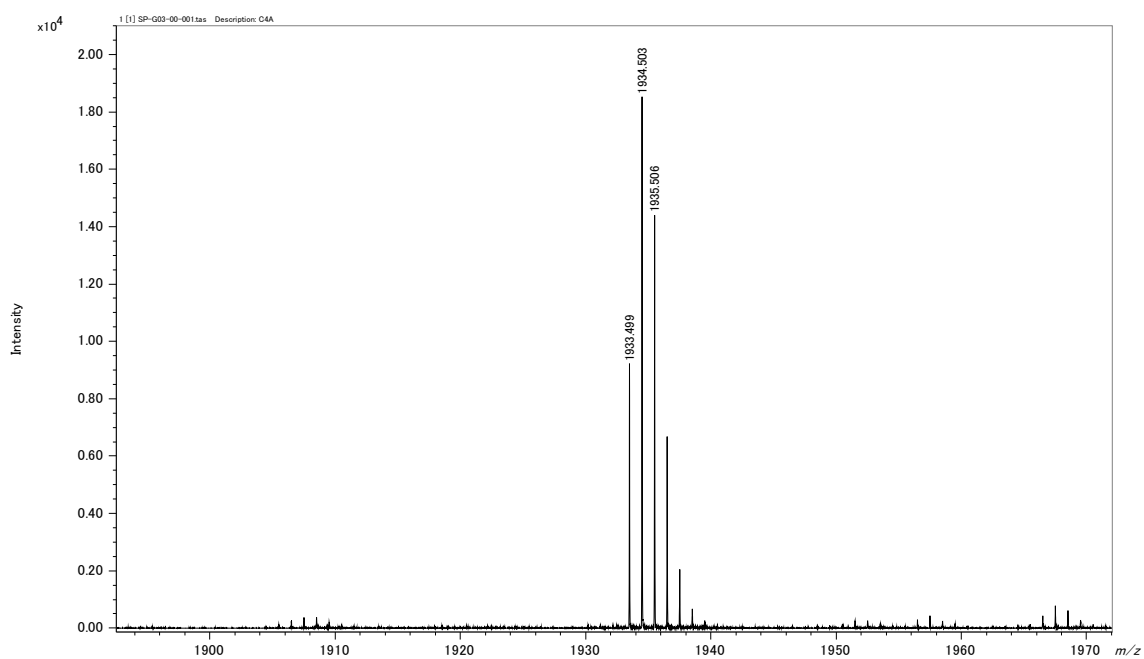

Figure S22. MALDI-TOF MS of C4A.

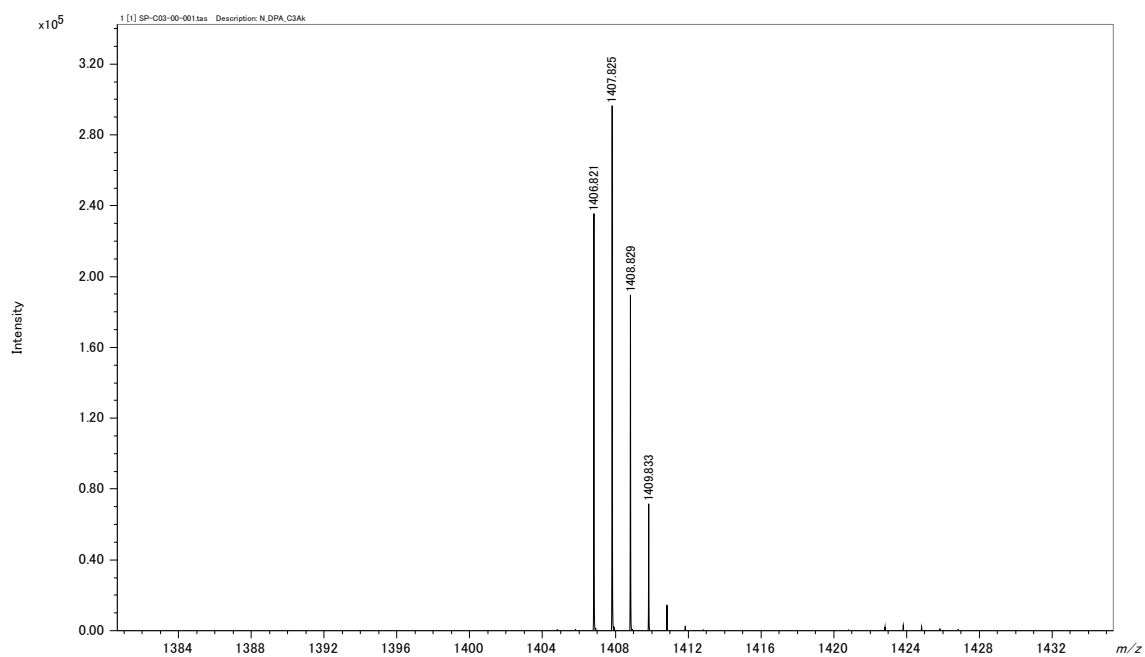

Figure S23. MALDI-TOF MS of **HC3A**.



#### 4. UV and fluorescence spectra

Table S1. Detailed absorption and emission peak positions of **C3A** and **2** in DCM.

| Compound   | $\lambda_{\text{abs}}/\text{nm}$ | $\epsilon/\text{M}^{-1}\text{cm}^{-1}$ | $\lambda_{\text{em}}/\text{nm}$ | $\Phi^{\text{a}}$ |
|------------|----------------------------------|----------------------------------------|---------------------------------|-------------------|
| <b>C3A</b> | 377                              | 52000                                  | 438                             | 0.15              |
| <b>C4A</b> | 378                              | 59900                                  | 439                             | 0.06              |
| <b>2</b>   | 376                              | 14900                                  | 425                             | 0.15              |

<sup>a</sup> Relative to quinine sulfate with  $\Phi_{\text{fl}}=0.55$  as the standard.

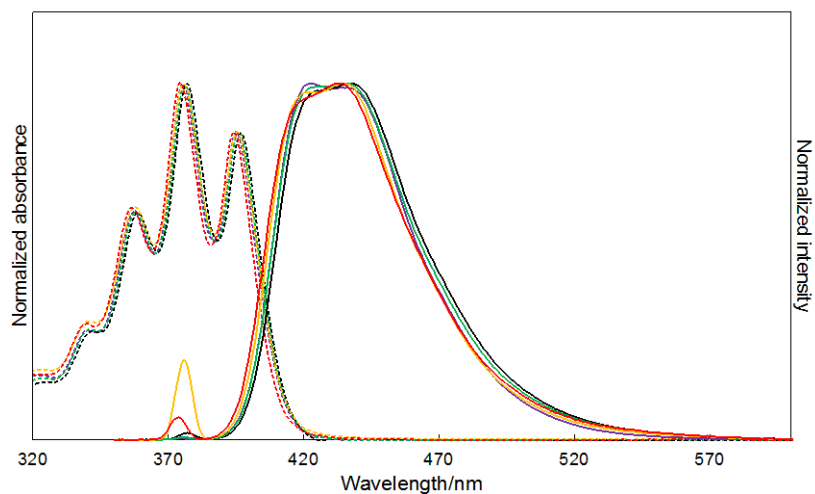

Figure S24. UV and fluorescence spectra of **C3A** in Cyclohexane (purple), THF (green), DCM (black), MeCN (orange), and MeOH (red) ( $10^{-5}$  M).

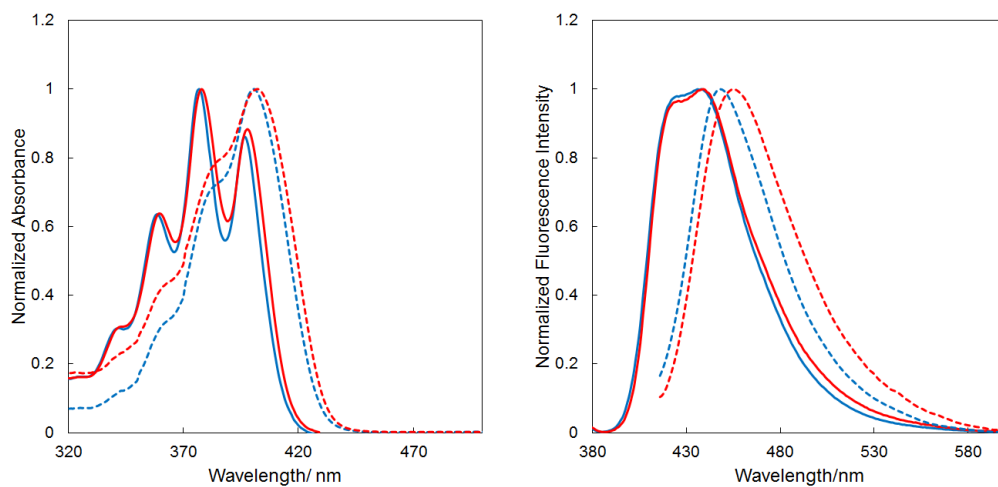

Figure S25. UV and fluorescence spectra of **C3A** (blue line) and **C4A** (red line) in DCM (solid line,  $10^{-5}$ M) and solid-state (dashed line).

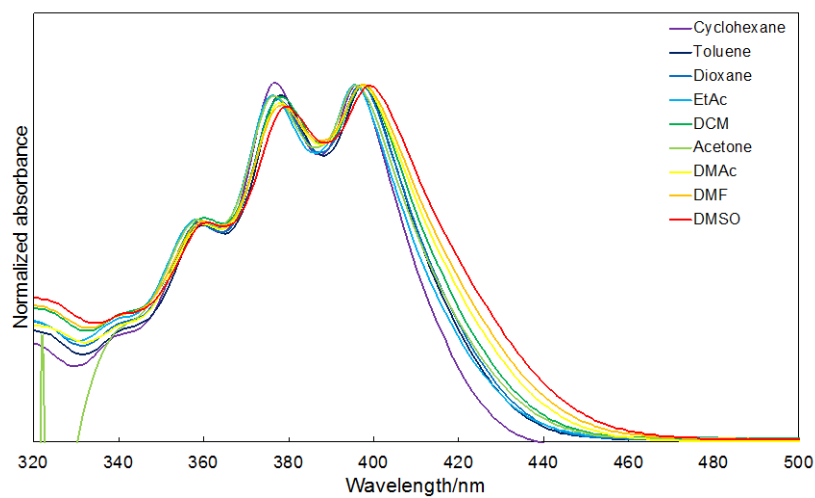

Figure S26. Solvent-dependent UV spectra of **HC3A** ( $10^{-5}$  M).

Table S2. Detailed absorption and emission peak positions of **HC3A** in different solvents.

|         | $E_T(30)$<br>/kcal·mol <sup>-1</sup> | <b>HC3A</b>            |                                   |                       |                   |          |
|---------|--------------------------------------|------------------------|-----------------------------------|-----------------------|-------------------|----------|
|         |                                      | $\lambda_{\text{abs}}$ | $\epsilon$                        | $\lambda_{\text{em}}$ | Stokes shift      | $\Phi^a$ |
|         |                                      | /nm                    | /M <sup>-1</sup> cm <sup>-1</sup> | /nm                   | /cm <sup>-1</sup> | /%       |
| CH      | 30.9                                 | 396                    | 31000                             | 449                   | 2980.8            | 0.10     |
| Hexane  | 31.0                                 | 395                    | 27000                             | 446                   | 2894.9            | 0.10     |
| Toluene | 33.9                                 | 397                    | 32500                             | 464                   | 3637.2            | 0.10     |
| DOX     | 36.0                                 | 397                    | 29200                             | 472                   | 4002.5            | 0.16     |
| EtOAc   | 38.1                                 | 395                    | 31700                             | 488                   | 4824.7            | 0.11     |
| DCM     | 40.7                                 | 397                    | 31300                             | 489                   | 4739.0            | 0.08     |
| Acetone | 42.2                                 | 396                    | 31500                             | 509                   | 5606.2            | 0.09     |
| DMAc    | 42.9                                 | 397                    | 30500                             | 525                   | 6141.3            | 0.11     |
| DMF     | 43.2                                 | 398                    | 29400                             | 527                   | 6150.3            | 0.09     |
| DMSO    | 45.1                                 | 399                    | 23000                             | 543                   | 6646.5            | 0.10     |

<sup>a</sup> Relative to quinine sulfate with  $\Phi_f=0.55$  as the standard.

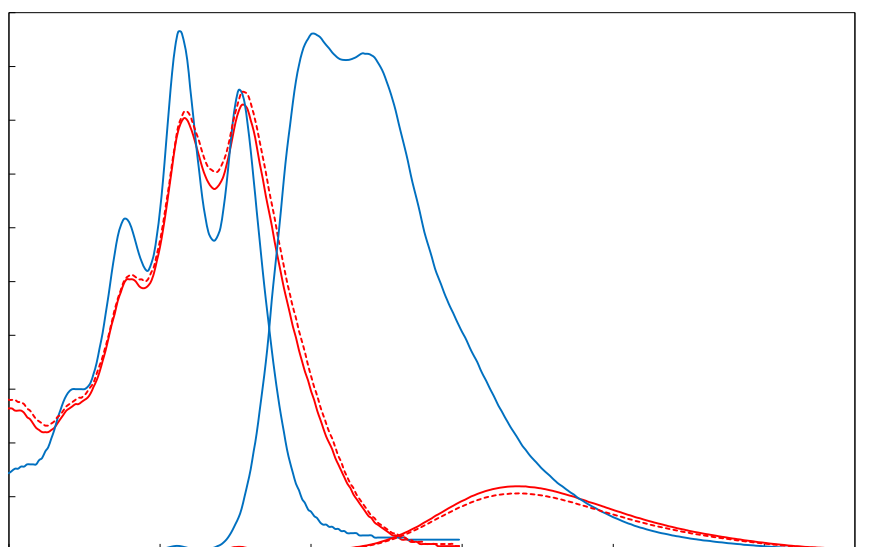

Figure S27. Changes in UV and fluorescence spectra of **HC3A** in DCM upon the addition of TFA and TEA; **HC3A** (red solid line), **HC3A**/TFA = 1/100 (blue solid line), and **HC3A**/TFA/TEA = 1/100/200 (red broken line).
